# Supplementary material for: Catalytic and anti-bacterial properties of biosynthesized silver nanoparticles using native inulin
Source: Royal Society of Chemistry journal article supplement (doi:10.1039/c8ra03386b), 2018-01-01
Supplement: c8ra03386b1.pdf [file c8ra03386b1.pdf]

## Supplementary materials

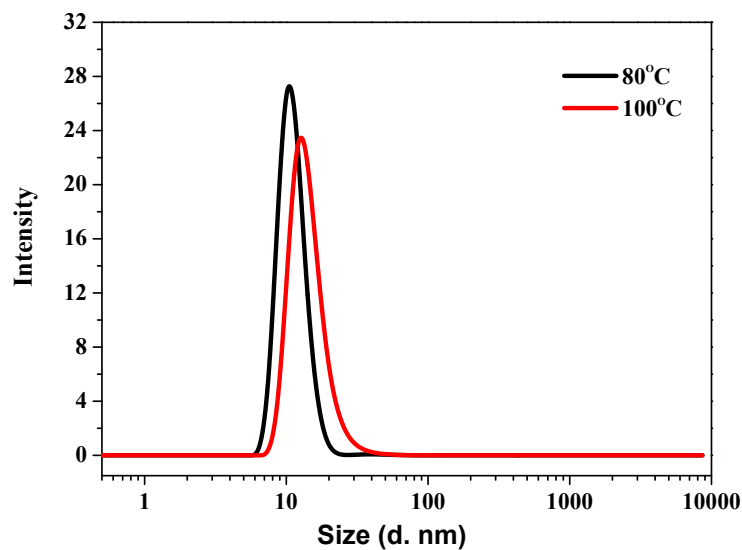

Fig. S1 Size of Ag NPs synthesized at 80°C and 100°C for 2 h using 0.1% inulin and 2 mM Ag<sup>1+</sup>

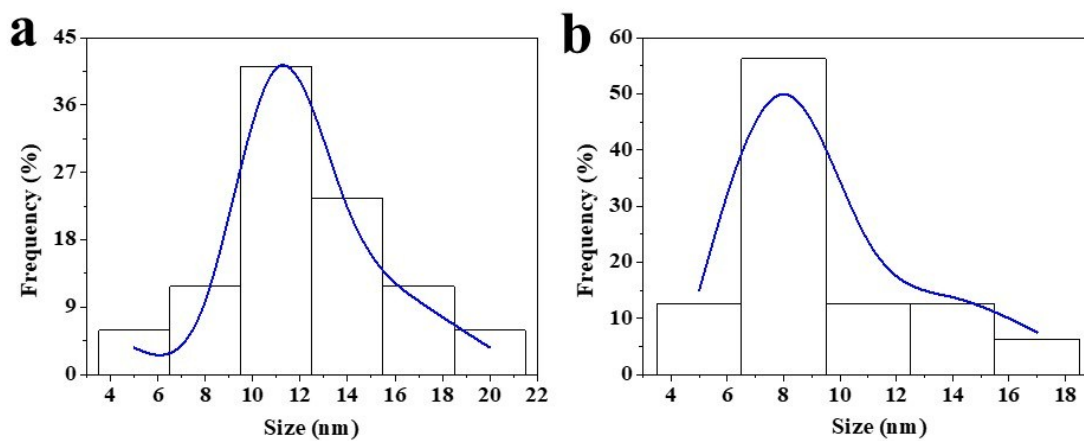

Fig.S2 Particle size distribution analysis of FE-TEM image (a Ag80 NPs, b Ag100 NPs)

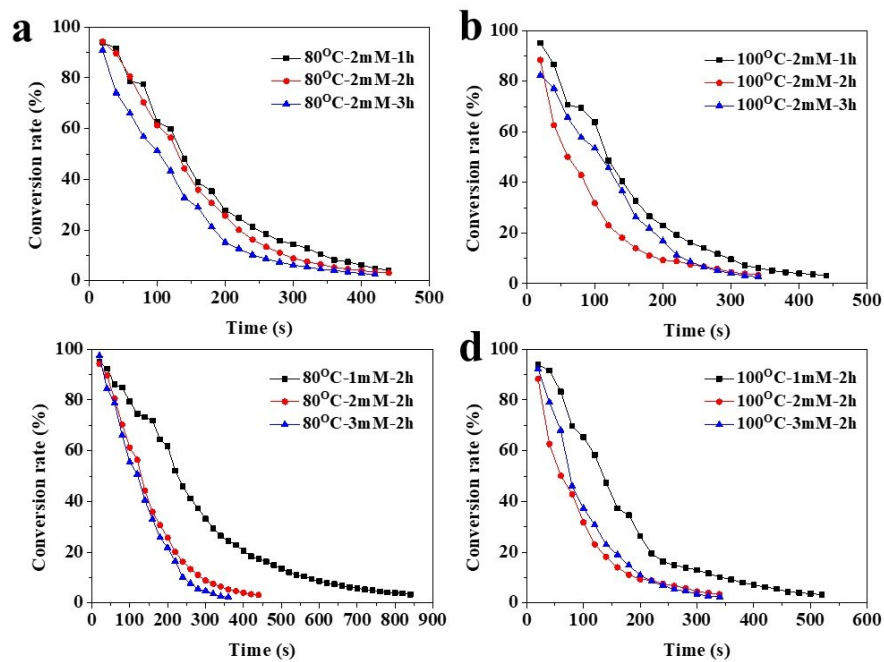

Fig.S3 The conversion rate of 4-NP based Ag NPs synthesized at 80°C (a, c) and 100°C (b, d), and different  $\text{Ag}^{1+}$  concentration.
